# Supplementary material for: VEGF188 promotes corneal reinnervation after injury
Source: JCI journal article supplement (doi:10.1172/jci.insight.130979), 2019-10-31
Supplement: sd1 [file 1]

You are being redirected.
